# Supplementary material for: Technical note: on LA–ICP-MS U–Pb dating of unetched and etched apatites
Source: Copernicus journal article supplement (doi:10.5194/gchron-2020-21), 2020-07-24
Supplement: Supplementary file 1 [file gchron-2020-21-supplement.pdf]

**Table S1**

LA-ICP-MS U-Pb analytical data obtained from unetched and etched apatite samples (samples OV-0421, MCH-38, TO-AM, CH-0403, and OC-1008).

| No | apatite   | 207/235 | 1SE abs | 206/238 | 1SE abs | rho       | Th, ppm | U, ppm | apatite etched | 207/235 | 1SE abs | 206/238 | 1SE abs | rho       | Th, ppm | U, ppm |
|----|-----------|---------|---------|---------|---------|-----------|---------|--------|----------------|---------|---------|---------|---------|-----------|---------|--------|
| 1  | OV0421-1  | 1.912   | 0.03    | 0.03274 | 0.00073 | 0.04964   | 2.781   | 97.34  | OV0421ET-1     | 2.336   | 0.049   | 0.03701 | 0.00082 | 0.029648  | 3.836   | 78.2   |
| 2  | OV0421-2  | 1.844   | 0.032   | 0.03228 | 0.00075 | 0.046308  | 2.558   | 96.69  | OV0421ET-2     | 1.824   | 0.032   | 0.03246 | 0.00072 | 0.35162   | 2.652   | 90.66  |
| 3  | OV0421-3  | 1.845   | 0.031   | 0.0333  | 0.00073 | 0.12814   | 2.268   | 99.06  | OV0421ET-3     | 1.596   | 0.026   | 0.03007 | 0.00066 | 0.097473  | 2.439   | 110.1  |
| 4  | OV0421-4  | 2.03    | 0.036   | 0.03373 | 0.00068 | 0.083501  | 1.151   | 88.3   | OV0421ET-4     | 1.693   | 0.029   | 0.03026 | 0.00064 | 0.36332   | 1.78    | 101.4  |
| 5  | OV0421-5  | 3.067   | 0.047   | 0.04228 | 0.00099 | 0.23535   | 1.939   | 57.56  | OV0421ET-5     | 2.755   | 0.056   | 0.03944 | 0.00097 | 0.096326  | 3.236   | 60.64  |
| 6  | OV0421-6  | 3.678   | 0.068   | 0.04875 | 0.0012  | 0.33021   | 0.601   | 50.83  | OV0421ET-6     | 3.062   | 0.06    | 0.04296 | 0.0012  | 0.45198   | 0.675   | 59.19  |
| 7  | OV0421-7  | 1.768   | 0.028   | 0.03261 | 0.00076 | 0.20555   | 2.4     | 109    | OV0421ET-7     | 1.755   | 0.03    | 0.03219 | 0.00066 | 0.03036   | 2.801   | 103.67 |
| 8  | OV0421-8  | 1.696   | 0.027   | 0.0306  | 0.00065 | 0.06584   | 2.184   | 112.6  | OV0421ET-8     | 1.783   | 0.026   | 0.03278 | 0.00083 | 0.03043   | 2.594   | 104.1  |
| 9  | OV0421-9  | 1.991   | 0.028   | 0.03446 | 0.00077 | 0.22537   | 1.624   | 100.23 | OV0421ET-9     | 2.055   | 0.03    | 0.03476 | 0.0008  | -0.10197  | 1.481   | 95.44  |
| 10 | OV0421-10 | 2.234   | 0.036   | 0.03644 | 0.00082 | 0.1949    | 3.376   | 83.42  | OV0421ET-10    | 2.607   | 0.047   | 0.03993 | 0.0009  | 0.083678  | 4.052   | 69.87  |
| 11 | OV0421-11 | 2.213   | 0.037   | 0.03425 | 0.00077 | 0.33904   | 2.089   | 84.3   | OV0421ET-11    | 1.956   | 0.039   | 0.0332  | 0.00077 | 0.30752   | 2.351   | 92.17  |
| 12 | OV0421-12 | 2.389   | 0.034   | 0.0375  | 0.0009  | 0.12693   | 1.838   | 77.95  | OV0421ET-12    | 2.262   | 0.039   | 0.0364  | 0.00087 | 0.036866  | 1.849   | 78.38  |
| 13 | OV0421-13 | 2.246   | 0.038   | 0.03715 | 0.00081 | 0.10704   | 4.576   | 79.28  | OV0421ET-13    | 2.101   | 0.041   | 0.03546 | 0.00086 | 0.032802  | 4.891   | 77.67  |
| 14 | OV0421-14 | 2.042   | 0.032   | 0.03407 | 0.00082 | 0.1209    | 3.804   | 102.12 | OV0421ET-14    | 1.844   | 0.033   | 0.03222 | 0.00075 | 0.3189    | 2.606   | 99.5   |
| 15 | OV0421-15 | 2.274   | 0.037   | 0.03625 | 0.00094 | 0.55393   | 2.418   | 81.8   | OV0421ET-15    | 2.167   | 0.051   | 0.03392 | 0.00092 | 0.40873   | 1.497   | 78.8   |
| 16 | OV0421-16 | 2.064   | 0.046   | 0.03249 | 0.00077 | 0.27576   | 2.86    | 83.7   | OV0421ET-16    | 1.711   | 0.034   | 0.03007 | 0.00072 | 0.23502   | 3.181   | 97.43  |
| 17 | OV0421-17 | 2.338   | 0.034   | 0.03773 | 0.0008  | 0.19685   | 3.431   | 83.98  | OV0421ET-17    | 2.124   | 0.04    | 0.03544 | 0.00073 | -0.053218 | 2.632   | 81.01  |
| 18 | OV0421-18 | 1.657   | 0.025   | 0.03103 | 0.00069 | 0.19616   | 2.575   | 113.94 | OV0421ET-18    | 1.581   | 0.026   | 0.03019 | 0.00066 | 0.16056   | 3.22    | 111.8  |
| 19 | OV0421-19 | 2.635   | 0.042   | 0.03953 | 0.00088 | 0.0021676 | 3.553   | 66.66  | OV0421ET-19    | 2.397   | 0.041   | 0.03761 | 0.00088 | 0.19211   | 3.397   | 73.31  |
| 20 | OV0421-20 | 3.058   | 0.082   | 0.0451  | 0.0015  | 0.7698    | 0.935   | 57.2   | OV0421ET-20    | 1.666   | 0.029   | 0.03183 | 0.00067 | 0.40613   | 2.923   | 103.73 |
| 21 | OV0421-21 | 1.901   | 0.032   | 0.03291 | 0.00075 | 0.18653   | 2.238   | 92.05  | OV0421ET-21    | 1.771   | 0.029   | 0.03199 | 0.00069 | 0.012987  | 2.621   | 95.1   |
| 22 | OV0421-22 | 1.598   | 0.026   | 0.02952 | 0.00068 | -0.087116 | 3.079   | 109.59 | OV0421ET-22    | 2.116   | 0.038   | 0.0335  | 0.00072 | -0.077803 | 4.951   | 78.41  |
| 23 | OV0421-23 | 2.02    | 0.035   | 0.03565 | 0.00084 | 0.13926   | 3.468   | 90.47  | OV0421ET-23    | 2.066   | 0.039   | 0.03516 | 0.00091 | 0.38667   | 3.334   | 80.03  |
| 24 | OV0421-24 | 1.822   | 0.038   | 0.03133 | 0.00069 | -0.027156 | 2.65    | 92.4   | OV0421ET-24    | 1.816   | 0.042   | 0.03218 | 0.00076 | 0.12734   | 2.899   | 88.7   |
| 25 | OV0421-25 | 2.785   | 0.043   | 0.04216 | 0.00095 | 0.25997   | 2.376   | 65.04  | OV0421ET-25    | 2.693   | 0.056   | 0.04103 | 0.001   | 0.22459   | 2.034   | 61.94  |
| 26 | OV0421-26 | 2.11    | 0.037   | 0.03506 | 0.00079 | 0.017132  | 4.491   | 93.53  | OV0421ET-26    | 2.135   | 0.034   | 0.03644 | 0.00078 | -0.076708 | 4.297   | 86.1   |
| 27 | OV0421-27 | 1.958   | 0.03    | 0.03428 | 0.00076 | 0.10506   | 0.694   | 86.68  | OV0421ET-27    | 1.661   | 0.029   | 0.03067 | 0.00074 | 0.28007   | 0.693   | 88.81  |

|    |           |       |       |         |         |          |       |        |             |       |       |         |         |           |       |        |
|----|-----------|-------|-------|---------|---------|----------|-------|--------|-------------|-------|-------|---------|---------|-----------|-------|--------|
| 28 | OV0421-28 | 2.298 | 0.043 | 0.03672 | 0.00096 | 0.14844  | 1.449 | 79.09  | OV0421ET-28 | 1.977 | 0.035 | 0.03414 | 0.0008  | 0.18481   | 1.936 | 84.73  |
| 29 | OV0421-29 | 2.134 | 0.028 | 0.03543 | 0.00076 | 0.20886  | 2.359 | 85.72  | OV0421ET-29 | 1.836 | 0.037 | 0.03395 | 0.00076 | 0.084615  | 2.224 | 95.21  |
| 30 | OV0421-30 | 1.837 | 0.03  | 0.03053 | 0.0008  | 0.087464 | 1.605 | 71.55  | OV0421ET-30 | 1.922 | 0.037 | 0.0313  | 0.00073 | 0.068964  | 2.04  | 80.63  |
| 31 | OV0421-31 | 1.968 | 0.04  | 0.03325 | 0.00078 | 0.062035 | 3.4   | 89.71  | OV0421ET-31 | 1.852 | 0.029 | 0.03343 | 0.00085 | 0.31751   | 4.182 | 93.77  |
| 32 | OV0421-32 | 1.853 | 0.03  | 0.03325 | 0.00072 | 0.111129 | 1.439 | 92.44  | OV0421ET-32 | 1.786 | 0.029 | 0.03173 | 0.00069 | -0.062022 | 1.844 | 93.28  |
| 33 | OV0421-33 | 1.602 | 0.023 | 0.03011 | 0.00071 | 0.21426  | 2.858 | 115.9  | OV0421ET-33 | 1.577 | 0.031 | 0.03156 | 0.00071 | 0.30871   | 3.691 | 116.5  |
| 34 | OV0421-34 | 1.693 | 0.028 | 0.03055 | 0.00076 | 0.16374  | 1.294 | 100.72 | OV0421ET-34 | 1.662 | 0.03  | 0.03142 | 0.00074 | -0.002854 | 1.788 | 97.24  |
| 35 | OV0421-35 | 3.445 | 0.088 | 0.0459  | 0.0014  | 0.61214  | 0.209 | 53.5   | OV0421ET-35 | 1.77  | 0.035 | 0.03086 | 0.00078 | 0.15717   | 0.635 | 98.4   |
| 36 | OV0421-36 | 1.49  | 0.029 | 0.02868 | 0.00067 | 0.14694  | 4.138 | 127.4  | OV0421ET-36 | 1.933 | 0.039 | 0.0339  | 0.00073 | 0.19573   | 2.145 | 98.2   |
| 37 | OV0421-37 | 3.356 | 0.065 | 0.04484 | 0.00097 | 0.022317 | 0.587 | 53.8   | OV0421ET-37 | 1.613 | 0.029 | 0.02979 | 0.00062 | 0.22577   | 1.784 | 107.78 |
| 38 | OV0421-39 | 2.636 | 0.042 | 0.03918 | 0.00087 | 0.29718  | 1.199 | 76.89  | OV0421ET-39 | 2.588 | 0.04  | 0.03935 | 0.00089 | 0.079901  | 1.166 | 74.63  |
| 39 | OV0421-40 | 2.204 | 0.04  | 0.03534 | 0.00079 | 0.22116  | 2.566 | 81.01  | OV0421ET-40 | 2.1   | 0.038 | 0.03511 | 0.0008  | 0.1479    | 2.509 | 82.05  |
| 40 | OV0421-41 | 2.083 | 0.032 | 0.03395 | 0.0008  | 0.16987  | 1.95  | 95.68  | OV0421ET-41 | 1.564 | 0.041 | 0.02909 | 0.00067 | 0.43406   | 3.145 | 123.5  |
| 41 | OV0421-42 | 2.857 | 0.056 | 0.04152 | 0.0011  | 0.20894  | 1.354 | 60.16  | OV0421ET-42 | 2.607 | 0.048 | 0.03966 | 0.00097 | 0.13594   | 1.376 | 61.29  |

|    |         |       |       |         |        |           |       |        |           |       |       |         |        |           |       |       |
|----|---------|-------|-------|---------|--------|-----------|-------|--------|-----------|-------|-------|---------|--------|-----------|-------|-------|
| 1  | MC38-1  | 8.58  | 0.24  | 0.11    | 0.0036 | -0.10235  | 8.399 | 9.82   | mc38ET-1  | 3.05  | 0.069 | 0.06064 | 0.0013 | -0.02751  | 34.92 | 29.27 |
| 2  | MC38-2  | 6.8   | 0.22  | 0.0973  | 0.0029 | 0.33242   | 25.71 | 13.98  | mc38ET-2  | 4.911 | 0.088 | 0.0768  | 0.0016 | 0.25484   | 34.34 | 20.82 |
| 3  | MC38-4  | 4.94  | 0.13  | 0.0783  | 0.0022 | 0.022182  | 7.723 | 16.95  | mc38ET-4  | 6.98  | 0.15  | 0.096   | 0.0021 | -0.087992 | 6.559 | 13.06 |
| 4  | MC38-5  | 7.69  | 0.25  | 0.0996  | 0.0032 | -0.30572  | 19.29 | 13.195 | mc38ET-5  | 7.8   | 0.17  | 0.1022  | 0.0022 | 0.073834  | 18.84 | 12.94 |
| 5  | MC38-6  | 7.63  | 0.27  | 0.1022  | 0.003  | -0.20552  | 5.407 | 11.52  | mc38ET-6  | 6.73  | 0.13  | 0.0941  | 0.0023 | 0.0248    | 6.239 | 13.8  |
| 6  | MC38-8  | 5.25  | 0.16  | 0.0836  | 0.0023 | 0.093317  | 22.41 | 18.72  | mc38ET-8  | 3.96  | 0.11  | 0.0689  | 0.0015 | 0.19744   | 22.02 | 24.96 |
| 7  | MC38-9  | 4.17  | 0.13  | 0.0718  | 0.0022 | 0.047002  | 29.39 | 22.56  | mc38ET-9  | 4.05  | 0.15  | 0.0715  | 0.0023 | 0.73881   | 37.2  | 26.3  |
| 8  | MC38-10 | 8.09  | 0.26  | 0.1082  | 0.0032 | 0.17386   | 24.2  | 11.97  | mc38ET-10 | 6.68  | 0.16  | 0.0932  | 0.0022 | 0.31936   | 20.67 | 15.52 |
| 9  | MC38-12 | 2.552 | 0.087 | 0.05788 | 0.0016 | -0.27342  | 40.49 | 40.86  | mc38ET-12 | 1.944 | 0.044 | 0.05183 | 0.001  | 0.10601   | 45.42 | 54.08 |
| 10 | MC38-13 | 4.72  | 0.22  | 0.0781  | 0.0024 | 0.16189   | 31.49 | 20.2   | mc38ET-13 | 8.98  | 0.17  | 0.1156  | 0.0032 | 0.37177   | 23.33 | 10.88 |
| 11 | MC38-14 | 7.08  | 0.22  | 0.0942  | 0.0027 | -0.096325 | 5.705 | 13.01  | mc38ET-14 | 5.85  | 0.11  | 0.0871  | 0.0022 | -0.091028 | 5.777 | 15.12 |
| 12 | MC38-15 | 3.302 | 0.086 | 0.066   | 0.0018 | -0.019409 | 3.987 | 25.32  | mc38ET-15 | 2.346 | 0.042 | 0.05645 | 0.0012 | 0.16995   | 5.657 | 42.09 |
| 13 | MC38-17 | 9.26  | 0.26  | 0.1152  | 0.0037 | -0.17487  | 12.44 | 9.07   | mc38ET-17 | 10.17 | 0.21  | 0.1243  | 0.0035 | 0.16176   | 13.87 | 8.902 |
| 14 | MC38-18 | 13.43 | 0.48  | 0.1507  | 0.0047 | -0.18388  | 14.53 | 6.881  | mc38ET-18 | 14.61 | 0.34  | 0.1602  | 0.0046 | 0.31305   | 15.52 | 6.872 |
| 15 | MC38-19 | 2.416 | 0.088 | 0.05689 | 0.0015 | 0.116     | 34.84 | 36.64  | mc38ET-19 | 1.781 | 0.058 | 0.05125 | 0.0011 | 0.34928   | 46.76 | 53.91 |
| 16 | MC38-20 | 6.98  | 0.24  | 0.0957  | 0.0028 | 0.061597  | 14.66 | 13.257 | mc38ET-20 | 4.826 | 0.098 | 0.0779  | 0.0018 | -0.047859 | 29.3  | 20.48 |
| 17 | MC38-21 | 7.29  | 0.26  | 0.0967  | 0.0034 | 0.058243  | 17.08 | 12.81  | mc38ET-21 | 9.43  | 0.18  | 0.1162  | 0.0032 | -0.22483  | 18.34 | 10.08 |
| 18 | MC38-22 | 2.16  | 0.1   | 0.05487 | 0.0015 | -0.18113  | 72.4  | 47     | mc38ET-22 | 6.82  | 0.14  | 0.0947  | 0.0022 | 0.082731  | 23.04 | 13.42 |
| 19 | MC38-23 | 8.69  | 0.27  | 0.1092  | 0.0036 | 0.063718  | 14.28 | 10.19  | mc38ET-23 | 7.98  | 0.22  | 0.1054  | 0.0026 | 0.21147   | 14.21 | 10.72 |
| 20 | MC38-25 | 4.33  | 0.14  | 0.074   | 0.0024 | 0.028123  | 16.49 | 21.36  | mc38ET-25 | 4.35  | 0.11  | 0.074   | 0.0018 | 0.32894   | 13.94 | 21.78 |

|    |         |       |       |         |        |           |       |        |           |       |       |         |        |           |       |        |
|----|---------|-------|-------|---------|--------|-----------|-------|--------|-----------|-------|-------|---------|--------|-----------|-------|--------|
| 21 | MC38-26 | 7.67  | 0.25  | 0.1029  | 0.0031 | -0.010533 | 7.38  | 11.79  | mc38ET-26 | 8.2   | 0.19  | 0.1082  | 0.0027 | 0.10752   | 7.19  | 10.381 |
| 22 | MC38-27 | 3.13  | 0.1   | 0.0655  | 0.0018 | 0.057523  | 39.09 | 30.55  | mc38ET-27 | 2.835 | 0.063 | 0.06202 | 0.0013 | 0.13235   | 28.11 | 30.97  |
| 23 | MC38-28 | 6.88  | 0.26  | 0.0965  | 0.0029 | 0.14447   | 40.53 | 14.33  | mc38ET-28 | 4.63  | 0.19  | 0.0756  | 0.0019 | 0.47797   | 42.41 | 20.78  |
| 24 | MC38-29 | 2.017 | 0.059 | 0.05289 | 0.0014 | 0.11886   | 3.67  | 42.3   | mc38ET-29 | 2.124 | 0.048 | 0.05509 | 0.0011 | 0.022676  | 3.247 | 46.22  |
| 25 | MC38-30 | 13.42 | 0.43  | 0.1456  | 0.0049 | 0.030857  | 19.98 | 7.47   | mc38ET-30 | 8.68  | 0.19  | 0.1108  | 0.0026 | 0.10662   | 26.72 | 11.121 |
| 26 | MC38-31 | 5.86  | 0.18  | 0.0846  | 0.0024 | -0.042189 | 6.728 | 15.16  | mc38ET-31 | 6.55  | 0.11  | 0.0926  | 0.0021 | -0.007856 | 6.788 | 13.72  |
| 27 | MC38-32 | 3.36  | 0.081 | 0.0654  | 0.0018 | -0.14706  | 35.26 | 29.58  | mc38ET-32 | 6.26  | 0.16  | 0.0877  | 0.0024 | 0.32995   | 25.62 | 16     |
| 28 | MC38-33 | 4.6   | 0.13  | 0.0763  | 0.0022 | -0.21905  | 45.03 | 21.99  | mc38ET-33 | 8.16  | 0.19  | 0.112   | 0.0033 | 0.060921  | 24.47 | 12.82  |
| 29 | MC38-34 | 7.87  | 0.24  | 0.1071  | 0.0032 | 0.22137   | 31.86 | 12.36  | mc38ET-34 | 8.23  | 0.22  | 0.1086  | 0.0027 | 0.39293   | 34.78 | 11.82  |
| 30 | MC38-35 | 3.67  | 0.11  | 0.0678  | 0.002  | -0.16352  | 5.782 | 25.32  | mc38ET-35 | 6.07  | 0.15  | 0.0878  | 0.0023 | 0.26207   | 7.45  | 13.27  |
| 31 | MC38-36 | 12.04 | 0.36  | 0.1393  | 0.0038 | 0.16079   | 21.03 | 8.17   | mc38ET-36 | 10.42 | 0.2   | 0.1261  | 0.0029 | 0.17867   | 22.42 | 9.33   |
| 32 | MC38-37 | 12    | 0.33  | 0.1394  | 0.0041 | -0.09378  | 17.47 | 8.64   | mc38ET-37 | 8.23  | 0.21  | 0.1112  | 0.0027 | 0.064521  | 18.16 | 11.28  |
| 33 | MC38-38 | 6.83  | 0.23  | 0.0983  | 0.0031 | 0.066152  | 17.6  | 12.7   | mc38ET-38 | 8.97  | 0.24  | 0.1157  | 0.0029 | 0.15509   | 20.29 | 10.218 |
| 34 | MC38-39 | 11.5  | 0.3   | 0.136   | 0.0046 | 0.0040653 | 20.14 | 8.58   | mc38ET-39 | 9.9   | 0.23  | 0.1249  | 0.0034 | -0.091425 | 21.65 | 9.417  |
| 35 | MC38-40 | 6.2   | 0.19  | 0.0917  | 0.0027 | 0.1589    | 16.36 | 15.047 | mc38ET-40 | 7.54  | 0.15  | 0.1027  | 0.0024 | 0.20471   | 10.77 | 11.56  |
| 36 | MC38-41 | 3.25  | 0.095 | 0.0636  | 0.0019 | 0.048468  | 15.62 | 26.33  | mc38ET-41 | 8.49  | 0.16  | 0.1103  | 0.0031 | 0.10094   | 11.94 | 10.002 |
| 37 | MC38-43 | 9.4   | 0.23  | 0.1213  | 0.0039 | -0.15598  | 9.548 | 9.967  | mc38ET-43 | 8.65  | 0.21  | 0.1105  | 0.0029 | 0.18857   | 8.63  | 9.712  |
| 38 | MC38-44 | 6.65  | 0.21  | 0.094   | 0.0031 | -0.21387  | 1.248 | 13.96  | mc38ET-44 | 4.52  | 0.1   | 0.0756  | 0.0019 | 0.025768  | 2.785 | 20.13  |
| 39 | MC38-46 | 8.5   | 0.26  | 0.1107  | 0.0038 | 0.096634  | 7.335 | 11.142 | mc38ET-46 | 7.04  | 0.14  | 0.0956  | 0.0025 | -0.086637 | 7.506 | 12.358 |
| 40 | MC38-47 | 4.57  | 0.19  | 0.0769  | 0.0027 | -0.12323  | 22.79 | 21.85  | mc38ET-47 | 3.985 | 0.095 | 0.0709  | 0.0015 | 0.10622   | 21.74 | 23.41  |
| 41 | MC38-48 | 15.37 | 0.52  | 0.1682  | 0.0056 | -0.011586 | 14.85 | 6.656  | mc38ET-48 | 12.48 | 0.27  | 0.1446  | 0.0039 | -0.058721 | 18.34 | 8.242  |

|    |         |       |       |        |        |          |       |       |             |       |       |         |         |           |       |       |
|----|---------|-------|-------|--------|--------|----------|-------|-------|-------------|-------|-------|---------|---------|-----------|-------|-------|
| 1  | TOAM-9  | 9.01  | 0.22  | 0.1222 | 0.0035 | 0.10133  | 32.96 | 11.09 | ToAMetch-9  | 5.579 | 0.089 | 0.0923  | 0.0016  | -0.082282 | 66.68 | 20.3  |
| 2  | TOAM-10 | 7.14  | 0.17  | 0.1054 | 0.0031 | 0.17625  | 2.49  | 10.26 | ToAMetch-10 | 9.24  | 0.18  | 0.1243  | 0.0033  | 0.15645   | 0.479 | 7.946 |
| 3  | TOAM-13 | 11.57 | 0.3   | 0.1464 | 0.0047 | 0.1492   | 27.88 | 8.77  | ToAMetch-13 | 8.93  | 0.16  | 0.1224  | 0.003   | 0.1789    | 35.18 | 12.47 |
| 4  | TOAM-15 | 2.95  | 0.15  | 0.0699 | 0.0025 | 0.78856  | 14.6  | 34.6  | ToAMetch-15 | 2.866 | 0.059 | 0.06952 | 0.0009  | 0.086519  | 16.88 | 40.11 |
| 5  | TOAM-16 | 18.66 | 0.6   | 0.2104 | 0.008  | 0.19809  | 0.629 | 3.763 | ToAMetch-16 | 11.38 | 0.22  | 0.143   | 0.0033  | 0.22772   | 0.553 | 5.97  |
| 6  | TOAM-19 | 11.06 | 0.25  | 0.1395 | 0.0046 | 0.3203   | 23.42 | 8.8   | ToAMetch-19 | 2.32  | 0.044 | 0.06639 | 0.00081 | 0.24628   | 227.3 | 58.3  |
| 7  | TOAM-22 | 40.1  | 1.1   | 0.382  | 0.015  | 0.24801  | 1.324 | 2.407 | ToAMetch-22 | 28.2  | 1.1   | 0.289   | 0.012   | 0.73408   | 4.36  | 3.61  |
| 8  | TOAM-25 | 101.7 | 4.1   | 0.943  | 0.046  | 0.47264  | 5.64  | 0.545 | ToAMetch-25 | 43    | 1.7   | 0.409   | 0.016   | 0.56116   | 2.171 | 1.338 |
| 9  | TOAM-26 | 27.22 | 0.6   | 0.2826 | 0.01   | 0.30436  | 1.291 | 2.994 | ToAMetch-26 | 8.04  | 0.18  | 0.1122  | 0.0021  | 0.012007  | 13.51 | 12.45 |
| 10 | TOAM-27 | 56.3  | 4.1   | 0.532  | 0.037  | 0.86004  | 1.648 | 1.7   | ToAMetch-27 | 102.1 | 2.9   | 0.892   | 0.032   | 0.51686   | 1.494 | 0.988 |
| 11 | TOAM-28 | 52.8  | 2.1   | 0.517  | 0.024  | 0.68333  | 1.411 | 1.757 | ToAMetch-28 | 23.92 | 0.7   | 0.2514  | 0.0082  | 0.40409   | 1.672 | 4.15  |
| 12 | TOAM-29 | 2.029 | 0.048 | 0.0622 | 0.0015 | 0.051333 | 95.1  | 47.27 | ToAMetch-29 | 10.93 | 0.56  | 0.1342  | 0.0052  | 0.79591   | 7.05  | 9.09  |
| 13 | TOAM-30 | 2.332 | 0.048 | 0.0667 | 0.0016 | 0.036729 | 104.2 | 46.37 | ToAMetch-30 | 1.706 | 0.026 | 0.05741 | 0.00075 | -0.01568  | 170.5 | 74.59 |

|    |         |       |       |        |        |           |       |       |             |       |      |        |        |           |        |       |
|----|---------|-------|-------|--------|--------|-----------|-------|-------|-------------|-------|------|--------|--------|-----------|--------|-------|
| 14 | TOAM-32 | 4.94  | 0.11  | 0.0847 | 0.0027 | 0.048791  | 2.417 | 14.56 | ToAMetch-32 | 24.68 | 0.58 | 0.2466 | 0.0061 | 0.23784   | 1.908  | 3.796 |
| 15 | TOAM-33 | 48    | 1.3   | 0.441  | 0.016  | 0.25495   | 3.117 | 1.943 | ToAMetch-33 | 63    | 1.9  | 0.577  | 0.02   | 0.60343   | 4.084  | 1.611 |
| 16 | TOAM-34 | 13.51 | 0.91  | 0.161  | 0.009  | 0.83955   | 1.084 | 5.62  | ToAMetch-34 | 9.28  | 0.17 | 0.1231 | 0.0029 | 0.2423    | 1.11   | 8.99  |
| 17 | TOAM-37 | 28.73 | 0.7   | 0.2847 | 0.0089 | 0.31027   | 9.62  | 3.571 | ToAMetch-37 | 23.69 | 0.48 | 0.2537 | 0.0064 | 0.43378   | 14.57  | 4.775 |
| 18 | TOAM-39 | 85.3  | 2.6   | 0.771  | 0.034  | 0.44759   | 1.405 | 1.08  | ToAMetch-39 | 93.8  | 2.6  | 0.85   | 0.022  | 0.34225   | 3.131  | 1.083 |
| 19 | TOAM-40 | 69.4  | 1.9   | 0.62   | 0.024  | 0.24138   | 1.189 | 1.338 | ToAMetch-40 | 53.3  | 1    | 0.502  | 0.012  | 0.37338   | 1.48   | 1.942 |
| 20 | TOAM-42 | 24.73 | 0.73  | 0.2537 | 0.011  | 0.064314  | 0.361 | 2.403 | ToAMetch-42 | 25.21 | 0.7  | 0.2691 | 0.009  | 0.19602   | 0.2574 | 2.401 |
| 21 | TOAM-43 | 9.51  | 0.21  | 0.1211 | 0.0033 | 0.17302   | 22.11 | 8.89  | ToAMetch-43 | 25.65 | 0.65 | 0.263  | 0.0088 | 0.47208   | 8.64   | 3.82  |
| 22 | TOAM-44 | 35.42 | 0.84  | 0.349  | 0.012  | 0.32993   | 1.164 | 2.499 | ToAMetch-44 | 20.9  | 0.47 | 0.2267 | 0.006  | 0.23539   | 1.474  | 3.996 |
| 23 | TOAM-45 | 42.72 | 0.98  | 0.423  | 0.015  | 0.17725   | 1.159 | 2.28  | ToAMetch-45 | 89.2  | 1.5  | 0.837  | 0.022  | 0.414     | 1.666  | 1.139 |
| 24 | TOAM-46 | 64    | 1.8   | 0.617  | 0.024  | 0.40386   | 1.695 | 1.449 | ToAMetch-46 | 27.44 | 0.72 | 0.2836 | 0.0066 | 0.33448   | 1.802  | 3.389 |
| 25 | TOAM-47 | 6.51  | 0.15  | 0.1017 | 0.0032 | 0.15362   | 1.166 | 12.09 | ToAMetch-47 | 11.68 | 0.25 | 0.1477 | 0.0041 | 0.43374   | 1.342  | 8.16  |
| 26 | TOAM-49 | 30.74 | 0.69  | 0.3163 | 0.011  | -0.043819 | 2.522 | 3.123 | ToAMetch-49 | 23.36 | 0.67 | 0.2555 | 0.0079 | 0.26606   | 3.498  | 4.113 |
| 27 | TOAM-50 | 14.75 | 0.35  | 0.1758 | 0.006  | 0.38551   | 4.77  | 6.1   | ToAMetch-50 | 18.52 | 0.31 | 0.2041 | 0.0054 | -0.001936 | 16.35  | 5.182 |
| 28 | TOAM-51 | 12.18 | 0.38  | 0.1582 | 0.0055 | 0.19952   | 3.179 | 5.341 | ToAMetch-51 | 8.13  | 0.16 | 0.1185 | 0.003  | -0.052685 | 0.285  | 8.971 |
| 29 | TOAM-52 | 44.09 | 0.96  | 0.445  | 0.015  | -0.05383  | 1.284 | 2.273 | ToAMetch-52 | 46.7  | 1    | 0.452  | 0.01   | 0.31073   | 1.165  | 2.209 |
| 30 | TOAM-53 | 2.449 | 0.099 | 0.068  | 0.0019 | 0.58356   | 144.4 | 43.8  | ToAMetch-53 | 3.31  | 0.11 | 0.0745 | 0.0016 | 0.52179   | 100.1  | 29.8  |
| 31 | TOAM-54 | 45.3  | 1.9   | 0.451  | 0.02   | 0.74628   | 2.161 | 2.148 | ToAMetch-54 | 68.1  | 2.6  | 0.645  | 0.026  | 0.61873   | 1.846  | 1.49  |
| 32 | TOAM-55 | 11.07 | 0.31  | 0.1431 | 0.005  | 0.12451   | 1.397 | 6.49  | ToAMetch-55 | 10.68 | 0.39 | 0.1306 | 0.0058 | 0.29428   | 4.87   | 6.93  |

|    |           |       |       |        |        |            |       |       |               |       |       |        |        |         |       |       |
|----|-----------|-------|-------|--------|--------|------------|-------|-------|---------------|-------|-------|--------|--------|---------|-------|-------|
| 1  | CH0403-1  | 24.8  | 1.1   | 0.2809 | 0.012  | 0.72025    | 6.24  | 4.08  | CH0403etch-1  | 15.36 | 0.29  | 0.1855 | 0.0059 | 0.47954 | 12.68 | 7.11  |
| 2  | CH0403-2  | 33.6  | 2.6   | 0.357  | 0.025  | 0.97542    | 7.58  | 4.338 | CH0403etch-2  | 34.41 | 0.92  | 0.378  | 0.013  | 0.54977 | 7.09  | 4.014 |
| 3  | CH0403-3  | 11.49 | 0.96  | 0.161  | 0.011  | 0.92513    | 23.29 | 16.68 | CH0403etch-3  | 17.18 | 0.7   | 0.2083 | 0.0085 | 0.91929 | 9.61  | 7.84  |
| 4  | CH0403-4  | 6.92  | 0.16  | 0.1162 | 0.004  | -0.0016262 | 36.89 | 18.46 | CH0403etch-4  | 16.85 | 0.36  | 0.2175 | 0.0065 | 0.27588 | 16.74 | 7.99  |
| 5  | CH0403-5  | 7.96  | 0.4   | 0.1255 | 0.0062 | 0.86509    | 17.9  | 14.07 | CH0403etch-5  | 9.94  | 0.22  | 0.1469 | 0.0044 | 0.30722 | 24.19 | 11.26 |
| 6  | CH0403-6  | 13.73 | 0.36  | 0.1713 | 0.0066 | 0.46634    | 9.61  | 7.57  | CH0403etch-6  | 15.87 | 0.46  | 0.1973 | 0.0066 | 0.63201 | 11.28 | 8.12  |
| 7  | CH0403-7  | 8.94  | 0.21  | 0.1257 | 0.0046 | 0.063851   | 12.06 | 10.99 | CH0403etch-7  | 18.05 | 0.5   | 0.2087 | 0.0065 | 0.3184  | 12.81 | 6.34  |
| 8  | CH0403-8  | 6.07  | 0.11  | 0.1055 | 0.004  | 0.22725    | 29.44 | 19.21 | CH0403etch-8  | 6.71  | 0.13  | 0.1156 | 0.0032 | 0.58548 | 48.96 | 20.63 |
| 9  | CH0403-9  | 54    | 2.7   | 0.543  | 0.027  | 0.77407    | 4.18  | 2.4   | CH0403etch-9  | 31.9  | 2.4   | 0.339  | 0.021  | 0.90242 | 6.05  | 3.81  |
| 10 | CH0403-11 | 31.9  | 1.3   | 0.342  | 0.019  | 0.77827    | 4.767 | 4.37  | CH0403etch-11 | 5.74  | 0.17  | 0.1025 | 0.0029 | 0.50639 | 25.71 | 22.49 |
| 11 | CH0403-12 | 43.7  | 9.3   | 0.438  | 0.081  | 0.9948     | 14.81 | 8.24  | CH0403etch-12 | 18.95 | 0.4   | 0.2352 | 0.0067 | 0.41949 | 12.91 | 6.918 |
| 12 | CH0403-13 | 45.3  | 2.9   | 0.472  | 0.03   | 0.89018    | 5.95  | 3.35  | CH0403etch-13 | 21.3  | 1.5   | 0.263  | 0.014  | 0.90269 | 14.26 | 6.54  |
| 13 | CH0403-14 | 11.59 | 0.22  | 0.1577 | 0.0057 | 0.124      | 18.48 | 10.64 | CH0403etch-14 | 13.79 | 0.54  | 0.1839 | 0.0071 | 0.7912  | 16.44 | 9.9   |
| 14 | CH0403-15 | 13.82 | 0.36  | 0.1784 | 0.0065 | 0.65227    | 23.93 | 10.67 | CH0403etch-15 | 8.48  | 0.28  | 0.1265 | 0.0044 | 0.66157 | 26.3  | 15.33 |
| 15 | CH0403-17 | 5.073 | 0.093 | 0.0964 | 0.0033 | 0.060683   | 25.19 | 26.72 | CH0403etch-17 | 4.156 | 0.053 | 0.0869 | 0.0023 | 0.04817 | 28.86 | 30.77 |

|    |           |       |      |        |        |           |       |       |               |       |      |        |        |          |       |       |
|----|-----------|-------|------|--------|--------|-----------|-------|-------|---------------|-------|------|--------|--------|----------|-------|-------|
| 16 | CH0403-18 | 20.83 | 0.56 | 0.2388 | 0.0095 | 0.52489   | 15.43 | 7.57  | CH0403etch-18 | 21.87 | 0.69 | 0.2505 | 0.01   | 0.76455  | 11.47 | 4.98  |
| 17 | CH0403-19 | 10.04 | 0.55 | 0.144  | 0.0066 | 0.80112   | 16.5  | 10.52 | CH0403etch-19 | 26.5  | 0.64 | 0.2958 | 0.01   | 0.065302 | 4.635 | 3.75  |
| 18 | CH0403-20 | 18.69 | 0.34 | 0.2125 | 0.0081 | 0.0005902 | 7.98  | 6.59  | CH0403etch-20 | 16.08 | 0.37 | 0.1948 | 0.0064 | 0.25798  | 6.451 | 5.84  |
| 19 | CH0403-21 | 9.27  | 0.19 | 0.1359 | 0.0047 | -0.010194 | 27.74 | 14.75 | CH0403etch-21 | 8.13  | 0.19 | 0.1252 | 0.0041 | 0.43531  | 27.12 | 13.11 |
| 20 | CH0403-22 | 15.09 | 0.31 | 0.1803 | 0.0063 | 0.37541   | 12.68 | 7.95  | CH0403etch-22 | 12.82 | 0.35 | 0.1707 | 0.0057 | 0.29171  | 16.48 | 8.84  |
| 21 | CH0403-24 | 23.1  | 0.72 | 0.2653 | 0.011  | 0.50123   | 4.081 | 5.7   | CH0403etch-24 | 20.88 | 0.61 | 0.2569 | 0.0093 | 0.56585  | 5.058 | 6.339 |
| 22 | CH0403-26 | 16.05 | 0.39 | 0.1947 | 0.0074 | 0.30844   | 10.69 | 7.89  | CH0403etch-26 | 11.99 | 0.27 | 0.1511 | 0.0048 | 0.31395  | 6.68  | 7.61  |
| 23 | CH0403-27 | 49.4  | 2.2  | 0.508  | 0.027  | 0.89796   | 5.15  | 3.32  | CH0403etch-27 | 23.82 | 0.65 | 0.261  | 0.0088 | 0.82608  | 5.19  | 4.89  |
| 24 | CH0403-28 | 11.38 | 0.38 | 0.1551 | 0.0059 | 0.66485   | 21.52 | 12.53 | CH0403etch-28 | 7.98  | 0.27 | 0.1291 | 0.0041 | 0.47551  | 34.4  | 17.81 |
| 25 | CH0403-29 | 5.8   | 0.15 | 0.1006 | 0.0036 | 0.27532   | 75    | 21.52 | CH0403etch-29 | 5.83  | 0.38 | 0.1013 | 0.0043 | 0.92434  | 2460  | 26.28 |
| 26 | CH0403-30 | 21.4  | 1.7  | 0.244  | 0.017  | 0.94516   | 6.894 | 7.171 | CH0403etch-30 | 9.04  | 0.33 | 0.1335 | 0.005  | 0.49343  | 5.84  | 6.77  |
| 27 | CH0403-31 | 5.51  | 0.22 | 0.0997 | 0.004  | 0.58003   | 23.29 | 24.3  | CH0403etch-31 | 13.5  | 0.66 | 0.1755 | 0.008  | 0.76204  | 9.2   | 8.95  |
| 28 | CH0403-33 | 23.11 | 0.58 | 0.2583 | 0.01   | 0.25934   | 15.08 | 5.209 | CH0403etch-33 | 24.5  | 1.3  | 0.2766 | 0.012  | 0.77853  | 15.72 | 5.2   |
| 29 | CH0403-35 | 16.55 | 0.93 | 0.1919 | 0.0088 | 0.86611   | 8.45  | 6.25  | CH0403etch-35 | 18.2  | 0.56 | 0.2233 | 0.0079 | 0.30449  | 5.113 | 5.32  |
| 30 | CH0403-36 | 16.98 | 0.42 | 0.2204 | 0.0077 | 0.26175   | 18.16 | 8.52  | CH0403etch-36 | 12.57 | 0.42 | 0.1691 | 0.0065 | 0.72641  | 21.59 | 12.1  |
| 31 | CH0403-37 | 51    | 5.8  | 0.512  | 0.054  | 0.98893   | 11.67 | 5.582 | CH0403etch-37 | 35    | 3.3  | 0.367  | 0.032  | 0.97037  | 9.93  | 4.381 |
| 32 | CH0403-38 | 10.75 | 0.28 | 0.1473 | 0.0061 | 0.66187   | 15.98 | 11.52 | CH0403etch-38 | 11.12 | 0.21 | 0.153  | 0.0047 | 0.061326 | 13.61 | 11    |
| 33 | CH0403-40 | 36.6  | 2.5  | 0.381  | 0.026  | 0.9415    | 9.01  | 5.081 | CH0403etch-40 | 38.3  | 1.6  | 0.403  | 0.021  | 0.95212  | 5.629 | 3.469 |
| 34 | CH0403-42 | 12.37 | 0.29 | 0.1616 | 0.0059 | 0.41756   | 17.62 | 9.84  | CH0403etch-42 | 7.37  | 0.17 | 0.1139 | 0.0034 | 0.5457   | 25.52 | 18.38 |
| 35 | CH0403-43 | 9.21  | 0.75 | 0.1401 | 0.0084 | 0.93891   | 31.1  | 14.6  | CH0403etch-43 | 49.7  | 1.2  | 0.498  | 0.018  | 0.42798  | 3.525 | 2.61  |
| 36 | CH0403-44 | 52.4  | 1.8  | 0.514  | 0.022  | 0.50283   | 3.047 | 2.162 | CH0403etch-44 | 39.8  | 2.5  | 0.396  | 0.023  | 0.8628   | 28    | 2.98  |

|    |           |       |       |        |        |            |       |       |             |       |       |        |        |           |       |       |
|----|-----------|-------|-------|--------|--------|------------|-------|-------|-------------|-------|-------|--------|--------|-----------|-------|-------|
| 1  | oC1008-1  | 2.773 | 0.062 | 0.1574 | 0.0035 | -0.0085239 | 48.3  | 45.73 | OC1008ET-1  | 3.102 | 0.051 | 0.1569 | 0.0027 | -0.010854 | 43.01 | 42.43 |
| 2  | oC1008-2  | 1.932 | 0.058 | 0.1456 | 0.0032 | 0.38786    | 64.4  | 57.7  | OC1008ET-2  | 2.148 | 0.069 | 0.1455 | 0.0026 | 0.21307   | 39.66 | 38.97 |
| 3  | oC1008-3  | 2.867 | 0.06  | 0.1644 | 0.0038 | 0.25518    | 48.27 | 46.79 | OC1008ET-3  | 2.817 | 0.057 | 0.1594 | 0.0028 | 0.27694   | 51.45 | 49.62 |
| 4  | oC1008-4  | 2.205 | 0.082 | 0.1501 | 0.0036 | -0.0386    | 21.11 | 17.65 | OC1008ET-4  | 3.03  | 0.12  | 0.1679 | 0.0045 | 0.38129   | 12.42 | 9.547 |
| 5  | oC1008-5  | 3.341 | 0.063 | 0.1623 | 0.0034 | 0.14072    | 34.08 | 36.36 | OC1008ET-5  | 3.428 | 0.058 | 0.1619 | 0.0027 | -0.17831  | 36.36 | 37.59 |
| 6  | oC1008-6  | 2.943 | 0.063 | 0.1627 | 0.0037 | 0.14212    | 38.64 | 37.61 | OC1008ET-6  | 2.771 | 0.051 | 0.1534 | 0.0027 | -0.22222  | 42.4  | 40.61 |
| 7  | oC1008-7  | 2.7   | 0.069 | 0.1541 | 0.0035 | 0.2407     | 67.83 | 47.36 | OC1008ET-7  | 3.34  | 0.065 | 0.1614 | 0.0029 | 0.1871    | 68.59 | 50.07 |
| 8  | oC1008-8  | 3.37  | 0.1   | 0.1575 | 0.0038 | 0.0027119  | 53.41 | 39.76 | OC1008ET-8  | 3.934 | 0.069 | 0.1709 | 0.0029 | 0.21243   | 47.99 | 37.17 |
| 9  | oC1008-9  | 3.063 | 0.061 | 0.1605 | 0.0038 | 0.31422    | 45.47 | 42.57 | OC1008ET-9  | 2.717 | 0.046 | 0.1552 | 0.0027 | 0.33798   | 50.76 | 46.79 |
| 10 | oC1008-10 | 2.884 | 0.041 | 0.1585 | 0.0032 | -0.042383  | 70.31 | 57.62 | OC1008ET-10 | 2.802 | 0.056 | 0.1568 | 0.0026 | 0.10846   | 79.38 | 63.22 |
| 11 | oC1008-11 | 3.002 | 0.073 | 0.162  | 0.0035 | 0.36143    | 50.15 | 45.2  | OC1008ET-11 | 2.881 | 0.056 | 0.1581 | 0.0028 | 0.23015   | 58.01 | 50.89 |
| 12 | oC1008-12 | 2.973 | 0.067 | 0.1624 | 0.0036 | 0.070303   | 42.67 | 43.38 | OC1008ET-12 | 3.291 | 0.072 | 0.1627 | 0.0028 | 0.085183  | 39.27 | 41.61 |
| 13 | oC1008-13 | 3.369 | 0.071 | 0.1653 | 0.0038 | 0.12384    | 18.98 | 29.81 | OC1008ET-13 | 2.79  | 0.11  | 0.1522 | 0.003  | 0.64735   | 29.06 | 37.2  |

|    |           |       |       |        |        |           |       |       |             |       |       |        |        |           |        |       |
|----|-----------|-------|-------|--------|--------|-----------|-------|-------|-------------|-------|-------|--------|--------|-----------|--------|-------|
| 14 | oC1008-14 | 3.34  | 0.062 | 0.1605 | 0.0033 | 0.1344    | 66.5  | 48.98 | OC1008ET-14 | 3.495 | 0.07  | 0.1626 | 0.0028 | 0.12325   | 59.18  | 45.81 |
| 15 | oC1008-15 | 1.966 | 0.062 | 0.1445 | 0.0034 | 0.15925   | 32.8  | 35.53 | OC1008ET-15 | 2.014 | 0.051 | 0.1438 | 0.0029 | 0.026612  | 31.97  | 30.69 |
| 16 | oC1008-16 | 3.304 | 0.092 | 0.1613 | 0.0036 | 0.32591   | 34.64 | 34.31 | OC1008ET-16 | 2.934 | 0.059 | 0.1546 | 0.0028 | 0.070203  | 34.22  | 34.06 |
| 17 | oC1008-17 | 3.5   | 0.11  | 0.1702 | 0.0043 | 0.12229   | 23.51 | 26.12 | OC1008ET-17 | 3.015 | 0.087 | 0.1642 | 0.0031 | 0.13819   | 32.44  | 33.03 |
| 18 | oC1008-18 | 3.485 | 0.086 | 0.1655 | 0.0037 | 0.12518   | 28.38 | 31.15 | OC1008ET-18 | 2.747 | 0.055 | 0.1582 | 0.0028 | 0.41252   | 49.6   | 47.05 |
| 19 | oC1008-19 | 3.144 | 0.072 | 0.1624 | 0.0033 | 0.084953  | 37.82 | 40.7  | OC1008ET-19 | 3.364 | 0.069 | 0.1609 | 0.0029 | 0.11181   | 31.49  | 35.98 |
| 20 | oC1008-20 | 2.801 | 0.054 | 0.1638 | 0.0036 | 0.16429   | 48.75 | 46.91 | OC1008ET-20 | 2.883 | 0.052 | 0.1644 | 0.003  | 0.26088   | 47.31  | 46.47 |
| 21 | oC1008-21 | 3.692 | 0.076 | 0.1671 | 0.0037 | 0.10729   | 31.49 | 34.53 | OC1008ET-21 | 3.541 | 0.06  | 0.1647 | 0.003  | 0.28043   | 35.61  | 37.39 |
| 22 | oC1008-22 | 2.226 | 0.052 | 0.1464 | 0.0032 | 0.1094    | 33.91 | 37.68 | OC1008ET-22 | 2.472 | 0.05  | 0.1512 | 0.0029 | 0.17741   | 34.92  | 39.19 |
| 23 | oC1008-23 | 2.552 | 0.073 | 0.1574 | 0.0038 | 0.11456   | 33.87 | 34.23 | OC1008ET-23 | 1.973 | 0.047 | 0.1464 | 0.0028 | 0.14915   | 39.1   | 38.28 |
| 24 | oC1008-24 | 3.318 | 0.046 | 0.1664 | 0.0036 | 0.12531   | 47    | 45.29 | OC1008ET-24 | 3.241 | 0.072 | 0.1621 | 0.003  | 0.0013897 | 44.45  | 42.58 |
| 25 | oC1008-25 | 2.61  | 0.083 | 0.1619 | 0.0035 | 0.0014728 | 47.38 | 42.42 | OC1008ET-25 | 2.58  | 0.12  | 0.1576 | 0.0031 | 0.86311   | 51.78  | 44.92 |
| 26 | oC1008-26 | 3.66  | 0.061 | 0.1675 | 0.0038 | 0.14254   | 29.69 | 32.27 | OC1008ET-26 | 3.46  | 0.06  | 0.1626 | 0.0028 | 0.054171  | 33.51  | 34.97 |
| 27 | oC1008-27 | 2.895 | 0.06  | 0.1602 | 0.0034 | 0.20034   | 70.18 | 55.23 | OC1008ET-27 | 3     | 0.056 | 0.1602 | 0.0028 | 0.085283  | 60.94  | 50.72 |
| 28 | oC1008-28 | 3.807 | 0.062 | 0.1707 | 0.004  | 0.44723   | 43.9  | 41.74 | OC1008ET-28 | 3.4   | 0.057 | 0.1668 | 0.0028 | 0.13763   | 66.5   | 52.92 |
| 29 | oC1008-29 | 2.758 | 0.066 | 0.1558 | 0.0033 | 0.12228   | 31.54 | 34.1  | OC1008ET-29 | 2.836 | 0.068 | 0.1555 | 0.0029 | 0.37109   | 31.2   | 33.75 |
| 30 | oC1008-30 | 2.998 | 0.083 | 0.1605 | 0.004  | 0.28721   | 24.17 | 21.82 | OC1008ET-30 | 3.47  | 0.1   | 0.1614 | 0.0032 | 0.13467   | 18.19  | 17.91 |
| 31 | oC1008-31 | 2.508 | 0.052 | 0.1601 | 0.0037 | 0.017459  | 34.13 | 35.06 | OC1008ET-31 | 2.228 | 0.048 | 0.1471 | 0.0026 | 0.0051564 | 34.27  | 33.93 |
| 32 | oC1008-32 | 2.228 | 0.039 | 0.1534 | 0.0034 | 0.15592   | 56.46 | 47.94 | OC1008ET-32 | 2.169 | 0.043 | 0.1456 | 0.0024 | -0.040873 | 64.44  | 53.68 |
| 33 | oC1008-33 | 3.492 | 0.063 | 0.1738 | 0.0039 | 0.19328   | 44.81 | 42.81 | OC1008ET-33 | 3.586 | 0.077 | 0.1678 | 0.003  | 0.26212   | 41.7   | 39.82 |
| 34 | oC1008-34 | 2.341 | 0.072 | 0.1563 | 0.0036 | 0.13734   | 26.53 | 29.54 | OC1008ET-34 | 2.338 | 0.067 | 0.1546 | 0.003  | 0.12254   | 25.76  | 26.1  |
| 35 | oC1008-36 | 2.575 | 0.066 | 0.1513 | 0.0034 | -0.15955  | 44.84 | 32.72 | OC1008ET-36 | 2.826 | 0.054 | 0.1573 | 0.0028 | -0.13507  | 53.77  | 38.77 |
| 36 | oC1008-37 | 3.282 | 0.075 | 0.1658 | 0.0036 | 0.3012    | 37.51 | 38.09 | OC1008ET-37 | 3.27  | 0.077 | 0.1632 | 0.003  | 0.20275   | 39.33  | 40.2  |
| 37 | oC1008-38 | 2.503 | 0.045 | 0.1578 | 0.0031 | 0.13391   | 189   | 85.18 | OC1008ET-38 | 2.655 | 0.053 | 0.1574 | 0.0026 | 0.22936   | 193.9  | 81.67 |
| 38 | oC1008-39 | 3.521 | 0.069 | 0.1653 | 0.0039 | 0.40682   | 31.91 | 32.55 | OC1008ET-39 | 3.543 | 0.073 | 0.1655 | 0.0028 | -0.041595 | 32.5   | 34.43 |
| 39 | oC1008-40 | 1.833 | 0.044 | 0.1428 | 0.0029 | -0.16471  | 82.28 | 65.4  | OC1008ET-40 | 2.323 | 0.051 | 0.1497 | 0.0029 | -0.02593  | 35.96  | 34.42 |
| 40 | oC1008-41 | 3.091 | 0.073 | 0.1701 | 0.0036 | 0.092847  | 46.62 | 45.94 | OC1008ET-41 | 3.203 | 0.063 | 0.1695 | 0.0029 | 0.23648   | 43.21  | 44.48 |
| 41 | oC1008-42 | 2.615 | 0.045 | 0.1573 | 0.0034 | 0.3701    | 109.4 | 68.66 | OC1008ET-42 | 2.357 | 0.046 | 0.1544 | 0.0028 | 0.090669  | 110.53 | 72.03 |
